# Supplementary material for: Function of a p24 Heterodimer in Morphogenesis and Protein Transport in Penicillium oxalicum
Source: PubMed Central journal article supplement (PMC4493713; doi:10.1038/srep11875), 2015-07-07
Supplement: srep11875-s1.pdf [file srep11875-s1.pdf]

**Function of a p24 heterodimer in morphogenesis and protein transport in**

***Penicillium oxalicum***

Fangzhong Wang <sup>1</sup>, Kuimei Liu <sup>1</sup>, Lijuan Han <sup>1</sup>, Baojie Jiang <sup>1</sup>, Mingyu Wang <sup>1</sup>, Xu  
Fang <sup>1,\*</sup>

<sup>1</sup> State Key Laboratory of Microbial Technology, School of Life Science, Shandong  
University, Jinan, Shandong, China

\* To whom correspondence is addressed. E-mail: fangxu@sdu.edu.cn

Tel: +86-531-88364004, Fax: +86-531-88364363

## Supplementary Information

### Fig. S1

Sequence alignment of p24 homologs in *P. oxalicum* 114-2 and *S.cerevisiae*.

The same amino acid residues are shaded.

### Fig. S2

SDS-PAGE analysis of intracellular proteins of p24 deletion strains grown in liquid media containing 2% Avicel, MM and 0.5% urea.

M: protein marker; 1: parent strain; 2: *P. oxalicum* 114-2  $\Delta p\delta\Delta PDE\_03657$ ;

3: *P. oxalicum* 114-2  $\Delta erp\Delta p\delta$ ; 4: *P. oxalicum* 114-2  $\Delta p\delta\Delta PDE\_00613$ ;

5: parent strain; 6: *P. oxalicum* 114-2  $\Delta PDE\_00613\Delta PDE\_03657$ ;

7: *P. oxalicum* 114-2  $\Delta erp\Delta PDE\_03657$ ; 8: *P. oxalicum* 114-2  $\Delta erp\Delta PDE\_00613$ .

### Fig. S3

Deletion of the *p $\delta$*  gene was confirmed by Southern blotting.

Panel a, schematic diagram of Southern blotting. Panel b, Southern blotting analysis of *p $\delta$*  deletion. M: 1 kb marker; 1: *P. oxalicum*  $\Delta erp$  strain; 2: *P. oxalicum*  $\Delta erp\Delta p\delta$  strain. Arrows are indicated the predicted band sizes of each strain.

**Table S1** Proteins were significantly increased or decreased in  $\Delta erp\Delta p\delta$  strain.

\* were predicted as GPI-anchor proteins

**Table S2** *P. oxalicum* strains that were used in this study.

**S1** Protein accession numbers in the phylogenetic tree in Fig. 1a.

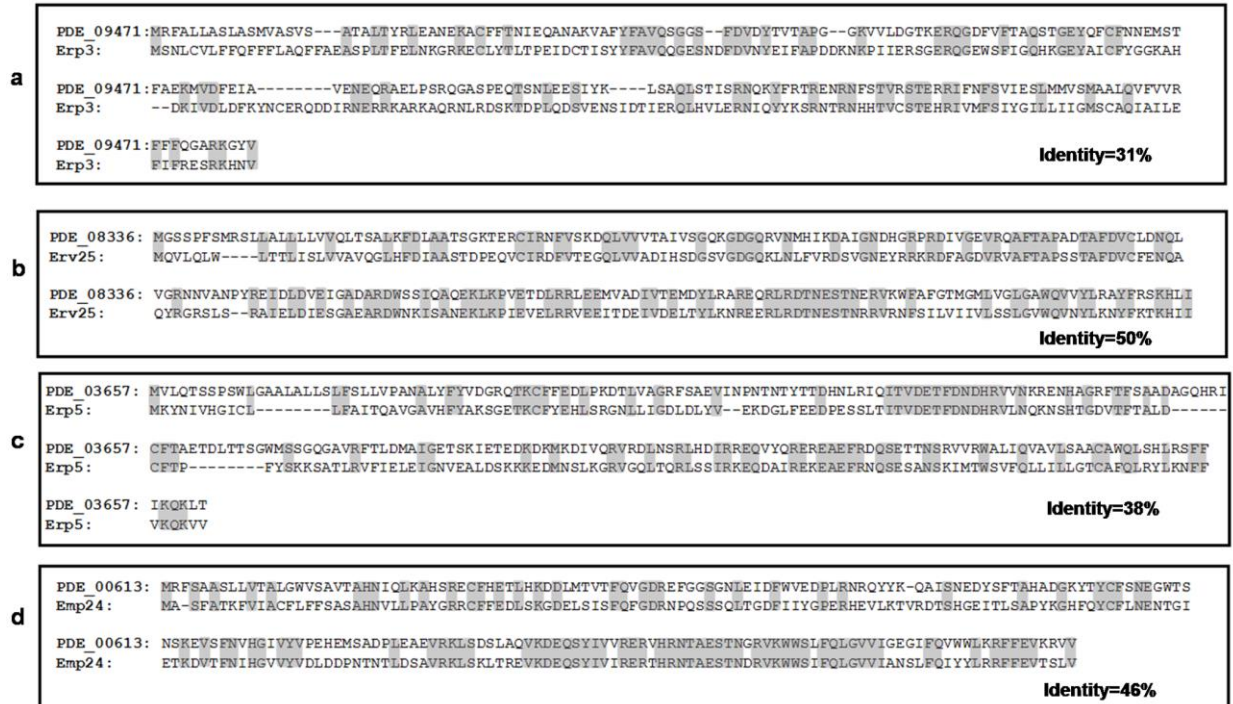

**Fig. S1** Sequence alignment of p24 homologs in *P. oxalicum* 114-2 and *S. cerevisiae*.

The same amino acid residues are shaded.

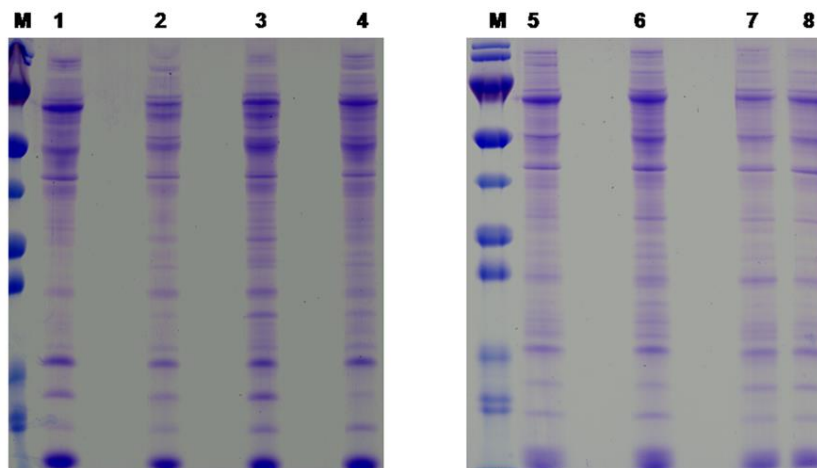

**Fig. S2** SDS-PAGE analysis of intracellular proteins of p24 deletion strains grown in

liquid media containing 2% Avicel, MM and 0.5% urea.

M: protein marker; 1: parent strain; 2: *P. oxalicum* 114-2  $\Delta p\delta\Delta PDE\_03657$ ;

3: *P. oxalicum* 114-2  $\Delta erp\Delta p\delta$ ; 4: *P. oxalicum* 114-2  $\Delta p\delta\Delta PDE\_00613$ ; 5: parent

strain; 6: *P. oxalicum* 114-2  $\Delta PDE\_00613\Delta PDE\_03657$ ;

7: *P. oxalicum* 114-2  $\Deltaerp\Delta PDE\_03657$ ; 8: *P. oxalicum* 114-2  $\Deltaerp\Delta PDE\_00613$ .

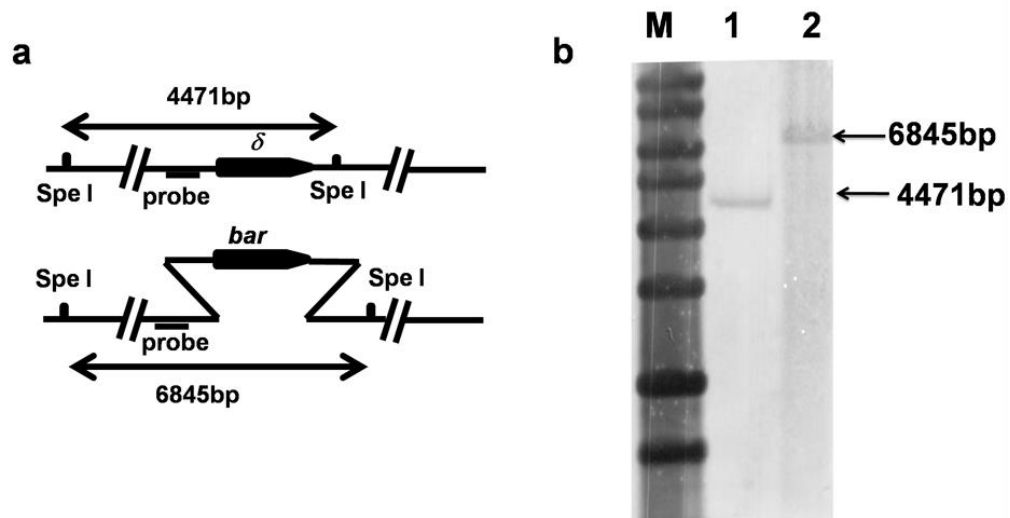

**Fig. S3** Deletion of the  $p\delta$  gene was confirmed by Southern blotting.

Panel a, schematic diagram of Southern blotting. Panel b, Southern blotting analysis of  $p\delta$  deletion. M: 1 kb marker; 1: *P. oxalicum*  $\Deltaerp$  strain; 2: *P. oxalicum*  $\Deltaerp\Delta p\delta$  strain. Arrows are indicated the predicted band sizes of each strain.

**Table S1** Proteins were significantly increased or decreased in  $\Delta erp\Delta p\delta$  strain.

\* were predicted as GPI-anchor proteins

**Table S 1.1 Cytoplasm (Secreted protein)**

| <b>Gene name</b> | <b>Protein name</b>                     | <b>Fold change</b> | <b>P value</b> | <b>Predicted protein function</b>                                  |
|------------------|-----------------------------------------|--------------------|----------------|--------------------------------------------------------------------|
| PDE_09285        | $\alpha$ -L-rhamnopyranohydrolase, GH28 | positive infinity  | 1.24e-04       | Rhamnogalacturonan hydrolysis                                      |
| PDE_02805*       | Hypothetical protein                    | 151.66             | 2.21e-04       | Unknown                                                            |
| PDE_07124        | Cellobiohydrolase, GH6                  | 64.4               | 2.23e-03       | Cellulose hydrolysis                                               |
| PDE_07936        | Metallo peptidase                       | 29.53              | 1.43e-03       | Polypeptide hydrolysis                                             |
| PDE_09226        | Endo- $\beta$ -1,4-glucanase, GH5       | 14.45              | 3.97e-04       | Cellulose hydrolysis                                               |
| PDE_07929        | Endo- $\beta$ -1,4-glucanase, GH7       | 11.29              | 1.63e-03       | Cellulose hydrolysis                                               |
| PDE_05263*       | Chitin glucanosyltransferase, GH16      | 9.09               | 2.63e-03       | The transfer of chitin to $\beta$ -1, 3- and $\beta$ -1, 6-glucans |
| PDE_05445        | Cellobiohydrolase, GH7                  | 8.83               | 9.68e-05       | Cellulose hydrolysis                                               |
| PDE_07897        | $\alpha$ -L-arabinofuranosidase, GH62   | 8.79               | 2.61e-04       | Arabinoxylan hydrolysis                                            |
| PDE_06439        | Endo- $\beta$ -1,4-glucanase, GH12      | 7.38               | 4.02e-05       | Cellulose hydrolysis                                               |
| PDE_06649        | Feruloyl esterase, CE1                  | 6.91               | 9.12e-03       | Arabinoxylan hydrolysis                                            |

|            |                                          |       |          |                                                                                                                                                            |
|------------|------------------------------------------|-------|----------|------------------------------------------------------------------------------------------------------------------------------------------------------------|
| PDE_02536* | Hypothetical protein                     | 3.96  | 4.64e-03 | Unknown                                                                                                                                                    |
| PDE_07945  | Cellobiohydrolase, GH7                   | 3.59  | 1.00e-02 | Cellulose hydrolysis                                                                                                                                       |
| PDE_08094  | Endo- $\beta$ -1,4-xylanase, GH10        | 3.43  | 3.32e-04 | Xylan hydrolysis                                                                                                                                           |
| PDE_03112* | Exo- $\beta$ -1,3-glucanase, GH17        | 2.83  | 7.96e-03 | $\beta$ -1, 3-glucans hydrolysis                                                                                                                           |
| PDE_08122  | Chitinase, GH18                          | 2.61  | 5.09e-03 | Chitin hydrolysis                                                                                                                                          |
| PDE_00500  | Non-hemolytic phospholipase C            | 1.7   | 8.38e-03 | Phosphatidylcholine and phosphatidylserine hydrolysis                                                                                                      |
| PDE_09417  | Glucoamylase, GH15                       | -1.97 | 1.84e-03 | $\alpha$ -1, 4-glucose hydrolysis                                                                                                                          |
| PDE_00615  | $\beta$ -1,3-glucanosyltransferase, GH17 | -2    | 1.00e-02 | Transferring the newly generated reducing end to the non-reducing end of another $\beta$ -1, 3-glucan molecule, and generating a new $\beta$ -1, 6-linkage |
| PDE_06770  | Hypothetical protein                     | -2.03 | 8.77e-03 | Unknown                                                                                                                                                    |
| PDE_03966  | $\alpha$ -glucosidase, GH31              | -3.18 | 2.03e-04 | Maltose and other small maltooligosaccharides hydrolysis                                                                                                   |

**Table S 1.2 Cytoplasm**

| <b>Gene name</b> | <b>Protein name</b> | <b>Fold change</b> | <b>P value</b> | <b>Predicted protein function</b> |
|------------------|---------------------|--------------------|----------------|-----------------------------------|
| PDE_02929        | D-xyllose reductase | positive infinity  | 2.95e-03       | Reducing D-xyllose into xylitol   |

|           |                                         |       |          |                                                                      |
|-----------|-----------------------------------------|-------|----------|----------------------------------------------------------------------|
| PDE_01713 | Formamidase                             | 13.19 | 4.23e-05 | Formamide hydrolysis                                                 |
| PDE_02372 | Coproporphyrinogen III oxidase          | 12.66 | 1.00e-02 | The heme biosynthesis                                                |
| PDE_09398 | Transaldolase                           | 11.47 | 1.80e-03 | Pentose-phosphate pathway                                            |
| PDE_03821 | Mannitol-1-phosphate<br>5-dehydrogenase | 9.1   | 5.96e-03 | Fructose and mannose metabolism                                      |
| PDE_08726 | Ribosome biogenesis protein             | 7.53  | 1.07e-03 | 20S pre-rRNA processing; 40S ribosomal<br>subunit synthesis          |
| PDE_05515 | $\beta$ -1,3-glucanase                  | 7.44  | 5.88e-05 | Hydrolysis of 1, 3- linkages in $\beta$ -glucans                     |
| PDE_02988 | PLC-like phosphodiesterase              | 7.28  | 9.09e-03 | Phosphatidylinositol metabolism                                      |
| PDE_04575 | Member of the PUF protein<br>family     | 6.25  | 3.25e-04 | Binding mRNAs encoding nucleolar ribosomal<br>RNA-processing factors |
| PDE_04048 | X-Pro aminopeptidase                    | 4.42  | 2.13e-04 | Peptidase hydrolysis                                                 |
| PDE_02117 | Guanyl-specific ribonuclease            | 4.23  | 1.41e-04 | Endoribonuclease activity                                            |
| PDE_04364 | GDSL esterase/lipase                    | 3.69  | 6.84e-03 | Ester bonds hydrolysis                                               |
| PDE_01218 | ABC transporter                         | 3.39  | 1.44e-03 | Translocation of a variety of compounds across<br>transmembrane      |
| PDE_04898 | Chitinase                               | 2.51  | 2.15e-03 | Chitin hydrolysis                                                    |
| PDE_05480 | Aminopeptidase                          | 2.31  | 5.30e-03 | Peptidase hydrolysis                                                 |

|            |                                                 |         |          |                                                                                                                                                         |
|------------|-------------------------------------------------|---------|----------|---------------------------------------------------------------------------------------------------------------------------------------------------------|
| PDE_03243  | Esterase/lipase                                 | 1.8     | 1.00e-02 | Ester bonds hydrolysis                                                                                                                                  |
| PDE_04618* | $\beta$ -1,3-glucanosyltransferase, GH72        | 1.51    | 7.97e-03 | Transferring the newly generated reducing end to the non-reducing end of another $\beta$ -1, 3-glucan molecule and elongating the $\beta$ -1, 3-linkage |
| PDE_04468  | $\alpha$ -1,6-mannanase                         | -1.55   | 1.14e-03 | Random hydrolysis of $\alpha$ -1, 6-mannosidic linkages in unbranched 1, 6-mannans                                                                      |
| PDE_02839  | DNA replication licensing factor Mcm3           | -1.72   | 8.61e-03 | DNA replication; Component of the Mcm2-7 hexameric helicase complex                                                                                     |
| PDE_08209  | Dienelactone hydrolase family protein           | -2.03   | 8.77e-03 | Aromatic compounds degradation                                                                                                                          |
| PDE_09561  | Lanosterol synthase                             | -2.9    | 1.96e-03 | Ergosterol biosynthesis                                                                                                                                 |
| PDE_06127  | Ribonucleoside-diphosphate reductase subunit M1 | -4.56   | 3.83e-03 | Catalyzing rate-limiting step in dNTP synthesis                                                                                                         |
| PDE_04823  | Hydroxymethylglutaryl-CoA synthase              | -4.69   | 6.03e-03 | Mevalonate biosynthesis                                                                                                                                 |
| PDE_02141  | Polyketide synthase                             | -5.9    | 1.08e-04 | Polyketides biosynthesis                                                                                                                                |
| PDE_01235  | Polyketide synthase                             | -14.79  | 6.41e-05 | Polyketides biosynthesis                                                                                                                                |
| PDE_02162  | The dioxygenase family protein                  | -22.32  | 7.55e-04 | Betalain biosynthesis                                                                                                                                   |
| PDE_01429  | Cytochrome P450 family protein                  | -319.88 | 1.92e-03 | Oxidoreductase activity                                                                                                                                 |



**Table S 1.3 proteasome**

| <b>Gene name</b> | <b>Protein name</b>               | <b>Fold change</b> | <b>P value</b> | <b>Predicted protein function</b>               |
|------------------|-----------------------------------|--------------------|----------------|-------------------------------------------------|
| PDE_02603        | 26S proteasome regulatory subunit | 5.63               | 4.98e-04       | Degrading proteins that have been ubiquitinated |

**Table S 1.4 Nucleus**

| <b>Gene name</b> | <b>Protein name</b>                   | <b>Fold change</b> | <b>P value</b> | <b>Predicted protein function</b>                                                       |
|------------------|---------------------------------------|--------------------|----------------|-----------------------------------------------------------------------------------------|
| PDE_08726        | Ribosome biogenesis protein           | 7.53               | 1.07e-03       | 20S pre-rRNA processing; 40S ribosomal subunit synthesis                                |
| PDE_06111        | DNA mismatch repair protein           | 3.59               | 4.31e-04       | DNA mismatch repair                                                                     |
| PDE_05989        | Kinesin family member 11              | 3.58               | 1.28e-03       | Spindle assembly and chromosome segregation                                             |
| PDE_02839        | DNA replication licensing factor Mcm3 | -1.72              | 8.61e-03       | Protein involved in DNA replication; Component of the Mcm2-7 hexameric helicase complex |
| PDE_06220        | DNA polymerase epsilon subunit 2      | -2.04              | 5.31e-03       | The maintenance of fidelity of chromosomal replication                                  |
| PDE_07239        | Quinate repressor protein             | -2.39              | 1.00e-02       | Transcription of the quinate utilization pathway genes                                  |
| PDE_02391        | Chromosome segregation protein        | -2.48              | 1.45e-04       | Sister chromatid cohesion and linking DNA synthesis to sister chromatid cohesion        |
| PDE_07738        | rRNA biogenesis protein               | -3.33              | 1.99e-04       | 18S and 5.8S rRNA biogenesis                                                            |

|           |                                     |       |          |                                                                                                                              |
|-----------|-------------------------------------|-------|----------|------------------------------------------------------------------------------------------------------------------------------|
| PDE_05592 | DEAD/DEAH box helicase              | -4.39 | 5.95e-03 | Nuclear RNA processing and degradation                                                                                       |
| PDE_06767 | Nucleolar protein                   | -5.42 | 1.00e-02 | 35S pre-RNA processing; 40S ribosomal subunit biogenesis                                                                     |
| PDE_09925 | Nuclear condensin complex subunit 3 | -5.9  | 5.95e-05 | The establishment and maintenance of chromosome condensation; the segregation and chromatin binding of the condensin complex |

**Table S 1.5 Cytoskeleton**

| <b>Gene name</b> | <b>Protein name</b>      | <b>Fold change</b> | <b>P value</b> | <b>Predicted protein function</b>                                                                                        |
|------------------|--------------------------|--------------------|----------------|--------------------------------------------------------------------------------------------------------------------------|
| PDE_08653        | Dynactin, 150 kDa        | 2.47               | 5.48e-03       | Dynactin is a multisubunit complex required for cytoplasmic dynein to efficiently transport vesicles along microtubules. |
| PDE_00169        | Arp2/3 complex subunit 2 | -12.02             | 1.63e-05       | The regulation of actin polymerization and mediating the formation of branched actin networks                            |

**Table S 1.6 Golgi-like apparatus**

| <b>Gene name</b> | <b>Protein name</b>               | <b>Fold change</b> | <b>P value</b> | <b>Predicted protein function</b>        |
|------------------|-----------------------------------|--------------------|----------------|------------------------------------------|
| PDE_04430        | Guanyl-nucleotide exchange factor | 2.45               | 1.24e-03       | Arl1p activation and vesicular transport |
| PDE_03529        | Aminophospholipid translocase     | 2.15               | 8.94e-03       | Endocytosis and vacuolar biogenesis      |

**Table S 1.7 Mitochondria**

| <b>Gene name</b> | <b>Protein name</b>                | <b>Fold change</b> | <b>P value</b> | <b>Predicted protein function</b>                                                          |
|------------------|------------------------------------|--------------------|----------------|--------------------------------------------------------------------------------------------|
| PDE_09399        | Superoxide dismutase [Cu-Zn]       | 6.28               | 4.15e-04       | Detoxifying superoxide                                                                     |
| PDE_05733        | 3-hydroxybutyryl-CoA dehydrogenase | 5.53               | 5.78e-03       | Catalyzing the NAD-dependent dehydration of $\beta$ -hydroxybutyryl-CoA to acetoacetyl-CoA |

**Table S 1.8 Endoplasmic reticulum**

| <b>Gene name</b> | <b>Protein name</b>                          | <b>Fold change</b> | <b>P value</b> | <b>Predicted protein function</b>                                                                                                                                            |
|------------------|----------------------------------------------|--------------------|----------------|------------------------------------------------------------------------------------------------------------------------------------------------------------------------------|
| PDE_08512        | Alkaline ceramidase                          | 7                  | 7.37e-03       | Sphingolipid ceramide hydrolysis                                                                                                                                             |
| PDE_07729        | Phosphatidylethanolamine N-methyltransferase | 6.06               | 4.82e-04       | The conversion of phosphatidylethanolamine to phosphatidylcholine                                                                                                            |
| PDE_03488        | Fatty acid transporter protein               | 5.89               | 7.55e-04       | Long chain fatty acids transport                                                                                                                                             |
| PDE_06282        | ER quality control lectin                    | 1.89               | 2.12e-03       | The bridging protein between the machinery that extracts misfolded proteins from the ER lumen and the machinery involved in their retro-translocation across the ER-membrane |

**Table S 1.9 Plasma membrane**

| <b>Gene name</b> | <b>Protein name</b>                 | <b>Fold change</b> | <b>P value</b> | <b>Predicted protein function</b> |
|------------------|-------------------------------------|--------------------|----------------|-----------------------------------|
| PDE_04996        | Putative sensor/transporter protein | 2.55               | 1.13e-03       | Cell wall biogenesis              |

**Table S 1.10 Hypothetical protein**

| <b>Gene name</b> | <b>Protein name</b>  | <b>Fold change</b> | <b>P value</b> | <b>Predicted protein function</b> |
|------------------|----------------------|--------------------|----------------|-----------------------------------|
| PDE_02805*       | Hypothetical protein | 151.66             | 2.21e-04       | Unknown                           |
| PDE_02536*       | Hypothetical protein | 3.96               | 4.64e-03       | Unknown                           |
| PDE_08596        | Hypothetical protein | 2.03               | 2.81e-03       | Unknown                           |
| PDE_05474        | Hypothetical protein | 1.73               | 1.49e-03       | Unknown                           |
| PDE_06770        | Hypothetical protein | 6.49               | 4.14e-03       | Unknown                           |
| PDE_07440        | Hypothetical protein | -2.65              | 8.42e-03       | Unknown                           |
| PDE_09712        | Hypothetical protein | -3.09              | 1.00e-02       | Unknown                           |
| PDE_05911        | Hypothetical protein | -3.12              | 9.30e-04       | Unknown                           |
| PDE_06953        | Hypothetical protein | -3.41              | 4.40e-03       | Unknown                           |
| PDE_00315        | Hypothetical protein | -5.64              | 5.82e-04       | Unknown                           |
| PDE_03744        | Hypothetical protein | -13.12             | 1.46e-04       | Unknown                           |

|           |                      |                |          |         |
|-----------|----------------------|----------------|----------|---------|
| PDE_06675 | Hypothetical protein | minus infinity | 6.74e-04 | Unknown |
|-----------|----------------------|----------------|----------|---------|

Table S2 *P. oxalicum* strains that were used in this study.

| strains                              | Genotype                                          | Source       |
|--------------------------------------|---------------------------------------------------|--------------|
| <i>P. oxalicum</i> 114-2             | Wildtype                                          | Reference 6  |
| <i>P. oxalicum</i> 114-2             | $\Delta pku70::hph$                               | Reference 51 |
| $\Delta pku70$                       |                                                   |              |
| <i>P. oxalicum</i> 114-2             | $\Delta pku70::hph; \Delta erp::ptrA$             | Reference 27 |
| $\Delta erp$                         |                                                   |              |
| <i>P. oxalicum</i> 114-2             | $\Delta pku70::hph;$                              | This study   |
| $\Delta erp\Delta p\delta$           | $\Delta erp::ptrA; \Delta p\delta::bar$           |              |
| <i>P. oxalicum</i> 114-2             | $\Delta pku70::hph;$                              | This study   |
| $\Delta erp\Delta PDE\_00613$        | $\Delta erp::ptrA; \Delta PDE\_00613::bar$        |              |
| <i>P. oxalicum</i> 114-2             | $\Delta pku70::hph;$                              | This study   |
| $\Delta erp\Delta PDE\_03657$        | $\Delta erp::ptrA; \Delta PDE\_03657::bar$        |              |
| <i>P. oxalicum</i> 114-2             | $\Delta pku70::hph;$                              | This study   |
| $\Delta p\delta\Delta PDE\_00613$    | $\Delta p\delta::ptrA; \Delta PDE\_00613::bar$    |              |
| <i>P. oxalicum</i> 114-2             | $\Delta pku70::hph;$                              | This study   |
| $\Delta p\delta\Delta PDE\_03657$    | $\Delta p\delta::ptrA; \Delta PDE\_03657::bar$    |              |
| <i>P. oxalicum</i> 114-2             | $\Delta pku70::hph;$                              | This study   |
| $\Delta PDE\_00613\Delta PDE\_03657$ | $\Delta PDE\_03657::ptrA; \Delta PDE\_00613::bar$ |              |
| BiFC- <i>erp/p</i> $\delta$          | $Pgpd::erp::eyfpN::TtrpC::hph;$                   | This study   |
|                                      | $Pgpd::p\delta::eyfpC::TtrpC::ptrA;$              |              |
| BiFC- <i>erp/eyfpC</i>               | $Pgpd::erp::eyfpN::TtrpC::hph;$                   | This study   |

---

|                          |                                     |            |
|--------------------------|-------------------------------------|------------|
|                          | <i>Pgpd::eyfpC::TrpC::ptrA;</i>     |            |
| BiFC- <i>pδ/eyfpN</i>    | <i>Pgpd::eyfpN::TrpC::hph;</i>      | This study |
|                          | <i>Pgpd::pδ::eyfpC::TrpC::ptrA;</i> |            |
| BiFC- <i>eyfpN/eyfpC</i> | <i>Pgpd::eyfpN::TrpC::hph;</i>      | This study |
|                          | <i>Pgpd::eyfpC::TrpC::ptrA;</i>     |            |

---

**S1.** Protein accession numbers in the phylogenetic tree in Fig. 1a.

Hp24 $\gamma$ 2 accession number: NP\_057124.2, Hp24 $\gamma$ 1 accession number: NP\_006849.1,  
 Hp24 $\gamma$ 4 accession number: NP\_031390.1, Hp24 $\gamma$ 3 accession number: NP\_861974.1,  
 Hp24 $\gamma$ 5 accession number: NP\_653277.1, Hp24 $\beta$ 1 accession number: NP\_006806.1,  
 Hp24 $\delta$ 1 accession number: NP\_006818.3, Hp24 $\alpha$ 2 accession number: NP\_059980.2;  
 Dcg31787 accession number: NP\_724105.1, Dcg9053A accession number:  
 NP\_572994.1, Dcg1967 accession number: NP\_572754.1, Dlogjam accession number:  
 AAL28932.1, Dcg3564 accession number: NP\_572165.1, Dcg9308 accession number:  
 NP\_611629.1, Declair accession number: NP\_788616.1, Dbaiser accession number:  
 NP\_651323.3; Serp2 accession number: NP\_009395.1, Serp4 accession number:  
 NP\_014659.1, Serp3 accession number: NP\_010266.1, Semp24 accession number:  
 NP\_011315.1, Serv25 accession number: NP\_013701.1, Serp1 accession number:  
 NP\_009402.1, Serp6 accession number: NP\_011513.1, Serp5 accession number:  
 NP\_011978.1; Xp24 $\gamma$ 3 accession number: NP\_989261.1, Xp24 $\gamma$ 5 accession number:  
 AAH87777.1, Xp24 $\gamma$ 1 accession number: NP\_001039263.1, Xp24 $\gamma$ 2 accession  
 number: NP\_001016560.1, Xp24 $\alpha$ 3 accession number: NP\_001015779.1, Xp24 $\delta$ 2  
 accession number: NP\_001007925.1; Pp24 $\alpha$ 1 accession number: XP\_517060;

A3g07680.1 accession number: NP\_187425.1, A3g29070.1 accession number:  
NP\_189550.2, A2g03290.X accession number: AAD17445.1, A1g69460.1 accession  
number: NP\_177105.2, A1g21900.1 accession number: NP\_173608.1, A1g09580.1  
accession number: NP\_172429.1. The tree was constructed by the neighbor-joining  
method. Bootstrap values are shown at each node, and are calculated from 1000 trees.  
Bar, evolutionary distance of 0.2.
